# Supplementary material for: Changes in the Plasma and Platelet Nitric Oxide Biotransformation Metabolites during Ischemic Stroke—A Dynamic Human LC/MS Metabolomic Study
Source: Antioxidants (Basel). 2022 May 12;11(5):955. doi: 10.3390/antiox11050955 (PMC9137966; doi:10.3390/antiox11050955)
Supplement: Supplementary file 1 [file antioxidants-11-00955-s001.zip › antioxidants-1698706-supplementary.pdf]

**Supplementary Table S1.** Comorbidities in the control group, stroke group on admission (diagnosed before the onset of stroke) and stroke group at the discharge diagnosed both, during hospitalization and before onset of stroke).

|                                               | Control group<br>N=39 | Stroke group on<br>admission<br>N=40 | Stroke group at<br>discharge<br>N=40 | <i>p</i> value           |
|-----------------------------------------------|-----------------------|--------------------------------------|--------------------------------------|--------------------------|
| Variables, units                              | Mean ± SEM            | Mean ± SEM                           | Mean ± SEM                           |                          |
| BMI, kg/m <sup>2</sup>                        | 28.3 ± 5.6            | 29.7 ± 5.1                           | N/A                                  | N/A                      |
| Cigarette smoking<br>never/ previous/ current | 37/1/1                | 33/3/4                               | N/A                                  | N/A                      |
| Hypertension                                  | 18                    | 28                                   | 35                                   | <0.05 <sup>a, b, c</sup> |
| Diabetes mellitus                             | 5                     | 5                                    | 7                                    | ns                       |
| Dyslipidemia or use of statins                | 17                    | 21                                   | 40                                   | <0.05 <sup>b, c</sup>    |
| Atrial fibrillation/flutter                   | 0                     | 0                                    | 0                                    | N/A                      |
| Previous coronary<br>revascularization        | 0                     | 0                                    | 0                                    | N/A                      |
| Previous myocardial infarction                | 0                     | 0                                    | 0                                    | N/A                      |
| Heart failure                                 | 0                     | 0                                    | 1                                    | ns                       |
| Peripheral artery disease                     | 0                     | 0                                    | 0                                    | N/A                      |
| Previous stroke/TIA                           | 0                     | 0                                    | 0                                    | N/A                      |
| Chronic kidney disease with<br>eGFR<45ml/min. | 0                     | 0                                    | 0                                    | N/A                      |
| Asthma/COPD                                   | 1                     | 2                                    | 2                                    | ns                       |

*Abbreviations:* SEM - standard error of mean, BMI - body mass index, TIA -transient ischemic attack, COPD- Chronic obstructive pulmonary disease, ns- non-significant, N/A – not-applicable, *p*<sup>a</sup> – *p*-value control group vs. stroke group on admission, *p*<sup>b</sup> – *p*-value control group vs. stroke group at discharge, *p*<sup>c</sup> – *p* value stroke group on admission vs. stroke group on discharge.

**Supplementary Table S2.** Treatment applied in the control group (chronic management), stroke group on admission (until hospitalization) and stroke group at discharge.

| Group of drugs                                                             | Control group<br>N=39 | Stroke group on<br>admission<br>N=40 | Stroke group at<br>discharge<br>N=40 | <i>p</i> value         |
|----------------------------------------------------------------------------|-----------------------|--------------------------------------|--------------------------------------|------------------------|
| Acetylsalicylic acid                                                       | 0                     | 0                                    | 40                                   | <0.05 <sup>b,c</sup>   |
| The second antiplatelet drug                                               | 0                     | 0                                    | 0                                    | N/A                    |
| LMWH                                                                       | 0                     | 0                                    | 0                                    | N/A                    |
| Alteplase                                                                  | 0                     | 0                                    | 0                                    | N/A                    |
| VKA                                                                        | 0                     | 0                                    | 0                                    | N/A                    |
| NOAC                                                                       | 0                     | 0                                    | 0                                    | N/A                    |
| ACE-I                                                                      | 10                    | 17                                   | 23                                   | <0.05 <sup>a,b,c</sup> |
| ARB                                                                        | 7                     | 11                                   | 16                                   | <0.05 <sup>b,c</sup>   |
| MRA                                                                        | 0                     | 0                                    | 1                                    | ns                     |
| Sacubitril/valsartan                                                       | 0                     | 0                                    | 1                                    | ns                     |
| β-blocker                                                                  | 4                     | 7                                    | 9                                    | 0.05 <sup>b</sup>      |
| Digitalis glycoside                                                        | 0                     | 0                                    | 0                                    | N/A                    |
| Calcium channel blocker<br>(non-dihydropyridines)                          | 0                     | 0                                    | 0                                    | N/A                    |
| Calcium channel blocker<br>(dihydropyridines)                              | 5                     | 19                                   | 24                                   | <0.05 <sup>b</sup>     |
| α-adrenergic blocker                                                       | 1                     | 0                                    | 0                                    | ns                     |
| Amiodarone                                                                 | 0                     | 0                                    | 0                                    | N/A                    |
| Thiazide or<br>thiazide-like diuretic                                      | 6                     | 8                                    | 18                                   | <0.05 <sup>b,c</sup>   |
| Loop diuretic                                                              | 1                     | 2                                    | 4                                    | 0.05 <sup>b</sup>      |
| Statin                                                                     | 14                    | 17                                   | 40                                   | <0.05 <sup>b,c</sup>   |
| Insulin                                                                    | 0                     | 0                                    | 1                                    | ns                     |
| Metformin                                                                  | 4                     | 5                                    | 6                                    | ns                     |
| SGLT2 inhibitor                                                            | 2                     | 2                                    | 3                                    | ns                     |
| Oral antidiabetics<br>other than SGLT2 inhibitor<br>and metformin          | 0                     | 1                                    | 0                                    | ns                     |
| Proton pump inhibitor                                                      | 3                     | 2                                    | 5                                    | 0.05 <sup>c</sup>      |
| Antiinflammatory<br>drugs/NSAID/<br>Corticosteroids/<br>Immunosuppressants | 0/0/0/0               | 0/0/0/0                              | 0/0/0/0                              | N/A                    |

Abbreviations: VKA- Vitamin K antagonist, LMWH- Low Molecular Weight Heparin, NOAC- new oral anticoagulant, MRA- mineralocorticoid receptor antagonist, SGLT2 inhibitor- sodium-glucose transport protein 2 inhibitor, ns- non-significant, NSAID- non-steroidal anti-inflammatory drugs, N/A – not-applicable, *p*<sup>a</sup> – *p*-value control group vs. stroke group on admission, *p*<sup>b</sup> – *p*-value control group vs. stroke group at discharge, *p*<sup>c</sup> – *p* value stroke group on admission vs. stroke group on discharge.

**Supplementary Table S3a.** The correlations between NO biotransformation metabolites and platelet aggregation.

|          | L-Arg 1 (PLT) | L-Arg 3 (PLT) | L-Arg 7 (PLT) | L-Arg-1 (PLT)/<br>ADMA-1<br>(PLT) | L-Arg-3 (PLT)/<br>ADMA-3<br>(PLT) | L-Arg-7 (PLT)/<br>ADMA-7<br>(PLT) |
|----------|---------------|---------------|---------------|-----------------------------------|-----------------------------------|-----------------------------------|
| AA-1     | 0.03          | -0.11         | -0.03         | 0.06                              | -0.03                             | -0.09                             |
| AA-3     | -0.44         | -0.44         | -0.16         | -0.38                             | -0.39                             | -0.47                             |
| AA-7     | -0.36         | -0.37         | -0.20         | -0.32                             | -0.31                             | -0.50                             |
| Col-1 -1 | 0.14          | -0.10         | -0.02         | 0.17                              | -0.01                             | -0.22                             |
| Col-1 -3 | -0.04         | -0.23         | -0.14         | 0.02                              | -0.12                             | -0.50                             |
| Col-1 -7 | -0.15         | -0.29         | -0.07         | -0.09                             | -0.18                             | -0.67                             |
| ADP-1    | 0.10          | 0.00          | -0.07         | 0.02                              | -0.01                             | -0.14                             |
| ADP-3    | 0.11          | -0.03         | 0.02          | 0.04                              | -0.06                             | -0.21                             |
| ADP-7    | 0.05          | -0.05         | -0.08         | -0.02                             | -0.08                             | -0.34                             |

$r \leq (-0.01)$  negative correlation;  $p < 0.05$

$r \geq 0.01$  positive correlation;  $p < 0.05$

$r$  no significant correlation;  $p > 0.05$

*Abbreviations:* L-Arg-1 (PLT)= L-Arginine in platelets on the 1<sup>st</sup> day, L-Arg -3 (PLT)= L-Arginine in platelets on the 3<sup>rd</sup> day, L-Arg -7 (PLT)= L-Arginine in platelets on the 7<sup>th</sup> day, L-Arg -1 (PLT)/ ADMA-1 (PLT)= L-Arginine in platelets on the 1<sup>st</sup> day to asymmetric dimethylarginine in platelets on the 1<sup>st</sup> day ratio, L-Arg -3 (PLT)/ ADMA-3 (PLT) = L-Arginine in platelets on the 3<sup>rd</sup> day to asymmetric dimethylarginine in platelets on the 3<sup>rd</sup> day ratio, L-Arg -7 (PLT)/ ADMA-7 (PLT) = L-Arginine in platelets on the 7<sup>th</sup> day to asymmetric dimethylarginine in platelets on the 7<sup>th</sup> day ratio. AA-1= arachidonic acid induced aggregation on the 1<sup>st</sup> day, AA-3= arachidonic acid induced aggregation on the 3<sup>rd</sup> day, AA-7= arachidonic acid induced aggregation on the 7<sup>th</sup> day, Col-1 -1= collagen 1 $\mu$ m induced aggregation on the 1<sup>st</sup> day, Col-1 -3= collagen 1 $\mu$ m induced aggregation on the 3<sup>rd</sup> day, Col-1 -7= collagen 1 $\mu$ m induced aggregation on the 7<sup>th</sup> day, ADP-1= adenosine diphosphate induced aggregation on the 1<sup>st</sup> day, ADP-3= adenosine diphosphate induced aggregation on the 3<sup>rd</sup> day, ADP-7= adenosine diphosphate induced aggregation on the 7<sup>th</sup>.

**Supplementary Table S3b.** The correlations between NO biotransformation metabolites and platelet aggregation.

|          | Cytrulline-1<br>(PLT) | Cytrulline-3<br>(PLT) | Cytrulline-7<br>(PLT) | Ornithine-1<br>(PLT) | Ornithine-3<br>(PLT) | Ornithine-7<br>(PLT) |
|----------|-----------------------|-----------------------|-----------------------|----------------------|----------------------|----------------------|
| AA-1     | -0.15                 | -0.34                 | -0.16                 | -0.16                | -0.35                | -0.01                |
| AA-3     | -0.29                 | -0.32                 | -0.12                 | -0.19                | -0.11                | 0.34                 |
| AA-7     | -0.23                 | -0.27                 | -0.20                 | -0.13                | -0.08                | 0.33                 |
| Col-1 -1 | -0.10                 | -0.33                 | -0.21                 | 0.04                 | -0.24                | 0.05                 |
| Col-1 -3 | -0.16                 | -0.38                 | -0.24                 | 0.06                 | -0.16                | 0.31                 |
| Col-1 -7 | -0.19                 | -0.42                 | -0.24                 | -0.01                | -0.21                | 0.53                 |
| ADP-1    | -0.02                 | -0.04                 | -0.16                 | 0.08                 | -0.04                | 0.05                 |
| ADP-3    | 0.06                  | -0.06                 | -0.09                 | 0.18                 | 0.08                 | 0.16                 |
| ADP-7    | 0.01                  | -0.07                 | -0.18                 | 0.14                 | 0.07                 | 0.24                 |

$r \leq (-0.01)$  negative correlation;  $p < 0.05$

$r \geq 0.01$  positive correlation;  $p < 0.05$

$r$  no correlation;  $p > 0.05$

*Abbreviations:* citrulline-1 (PLT) = citrulline in platelets on the 1<sup>st</sup> day; citrulline-3 (PLT) = citrulline in platelets on the 3<sup>rd</sup> day; citrulline-7 (PLT) = citrulline in platelets on the 7<sup>th</sup> day; ornithine-1 (PLT) = ornithine in platelets on the 1<sup>st</sup> day; ornithine -3 (PLT) = ornithine in platelets on the 3<sup>rd</sup> day, ornithine -7 (PLT) = ornithine in platelets on the 7<sup>th</sup> day; AA-1= arachidonic acid induced aggregation on the 1<sup>st</sup> day, AA-3= arachidonic acid induced aggregation on the 3<sup>rd</sup> day, AA-7= arachidonic acid induced aggregation on the 7<sup>th</sup> day, , Col-1 -1= collagen 1 $\mu$ m induced aggregation on the 1<sup>st</sup> day, Col-1 -3= collagen 1 $\mu$ m induced aggregation on the 3<sup>rd</sup> day, Col-1 -7= collagen 1 $\mu$ m induced aggregation on the 7<sup>th</sup> day, ADP-1= adenosine diphosphate induced aggregation on the 1<sup>st</sup> day, ADP-3= adenosine diphosphate induced aggregation on the 3<sup>rd</sup> day, ADP-7= adenosine diphosphate induced aggregation on the 7<sup>th</sup> day.

**Supplementary Table S3c.** The correlations between NO biotransformation metabolites and platelet aggregation.

|          | L-Arg-1<br>(PLT)/ L-Arg-<br>1 (PLS) | L-Arg-3<br>(PLT)/ L-Arg-<br>3 (PLS) | L-Arg-7<br>(PLT)/ L-Arg-<br>7 (PLS) | ADMA-1<br>(PLT)/ ADMA-<br>1 (PLS) | ADMA-3<br>(PLT)/ ADMA-<br>3 (PLS) | ADMA-7<br>(PLT)/ ADMA-<br>7 (PLS) |
|----------|-------------------------------------|-------------------------------------|-------------------------------------|-----------------------------------|-----------------------------------|-----------------------------------|
| AA-1     | 0.04                                | 0.06                                | 0.17                                | 0.00                              | -0.03                             | 0.01                              |
| AA-3     | -0.30                               | -0.24                               | -0.29                               | -0.21                             | -0.12                             | 0.35                              |
| AA-7     | -0.22                               | -0.17                               | -0.34                               | -0.05                             | -0.08                             | <b>0.39</b>                       |
| Col-1 -1 | 0.25                                | 0.15                                | 0.08                                | 0.07                              | -0.10                             | -0.03                             |
| Col-1 -3 | 0.10                                | 0.03                                | -0.21                               | 0.02                              | -0.18                             | 0.24                              |
| Col-1 -7 | 0.07                                | -0.06                               | <b>-0.42</b>                        | 0.07                              | -0.23                             | <b>0.52</b>                       |
| ADP-1    | 0.32                                | 0.39                                | 0.08                                | <b>0.36</b>                       | 0.22                              | 0.10                              |
| ADP-3    | 0.36                                | <b>0.40</b>                         | -0.03                               | 0.37                              | 0.23                              | 0.28                              |
| ADP-7    | 0.29                                | 0.35                                | -0.18                               | 0.41                              | 0.23                              | 0.37                              |

**$r \leq (-0.01)$**

negative correlation;  $p < 0.05$

**$r \geq 0.01$**

positive correlation;  $p < 0.05$

|                       |
|-----------------------|
| <b><math>r</math></b> |
|-----------------------|

no significant correlation;  $p > 0.05$

*Abbreviations:* L-Arg -1 (PLT)/ARG-1 (PLS)= L-Arginine in platelets on the 1<sup>st</sup> day to L-Arginine in plasma on the 1<sup>st</sup> day ratio, L-Arg -3 (PLT)/ L-Arg -3 (PLS) = L-Arginine in platelets on the 3<sup>rd</sup> day to L-Arginine in plasma on the 3<sup>rd</sup> day ratio, L-Arg -7 (PLT)/ L-Arg -7 (PLS) = L-Arginine in platelets on the 7<sup>th</sup> day to L-Arg in plasma on the 7<sup>th</sup> day ratio, ADMA-1 (PLT)/ADMA-1 (PLS)= asymmetric dimethylarginine in platelets on the 1<sup>st</sup> day to asymmetric dimethylarginine in plasma on the 1<sup>st</sup> day ratio, ADMA-3 (PLT)/ ADMA-3 (PLS) = asymmetric dimethylarginine in platelets on the 3<sup>rd</sup> day to asymmetric dimethylarginine in plasma on the 3<sup>rd</sup> day ratio, ADMA-7 (PLT)/ ADMA-7 (PLS) = asymmetric dimethylarginine in platelets on the 7<sup>th</sup> day to asymmetric dimethylarginine in plasma on the 7<sup>th</sup> day ratio, AA-1= arachidonic acid induced aggregation on the 1<sup>st</sup> day, AA-3= arachidonic acid induced aggregation on the 3<sup>rd</sup> day, AA-7= arachidonic acid induced aggregation on the 7<sup>th</sup> day, , Col-1 -1= collagen 1 $\mu$ m induced aggregation on the 1<sup>st</sup> day, Col-1 -3= collagen 1 $\mu$ m induced aggregation on the 3<sup>rd</sup> day, Col-1 -7= collagen 1 $\mu$ m induced aggregation on the 7<sup>th</sup> day, ADP-1= adenosine diphosphate induced aggregation on the 1<sup>st</sup> day, ADP-3= adenosine diphosphate induced aggregation on the 3<sup>rd</sup> day, ADP-7= adenosine diphosphate induced aggregation on the 7<sup>th</sup> day.
